# Supplementary material for: Role of Dopamine Receptors in the Anticancer Activity of ONC201
Source: PubMed Central journal article supplement — Neoplasia. 2017 Dec 5;20(1):80–91. doi: 10.1016/j.neo.2017.10.002 (PMC5725157; doi:10.1016/j.neo.2017.10.002), 2017-12-05

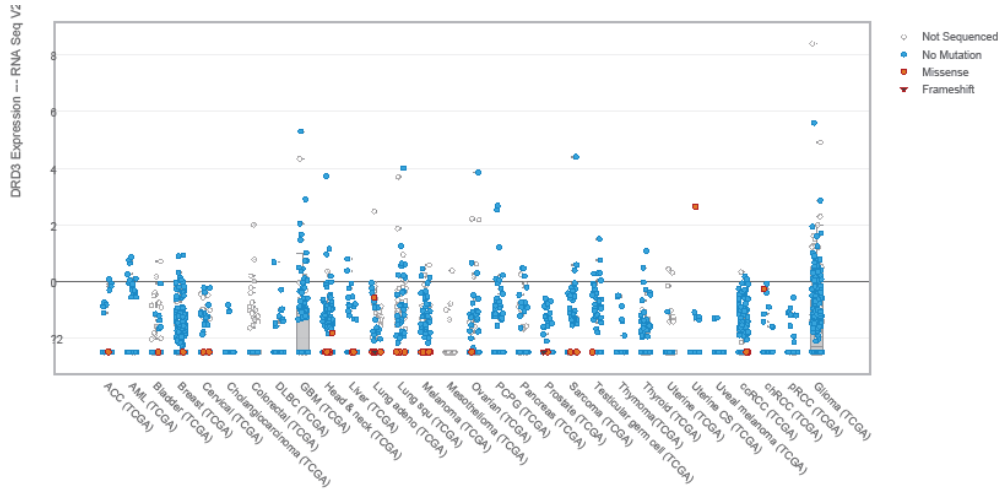

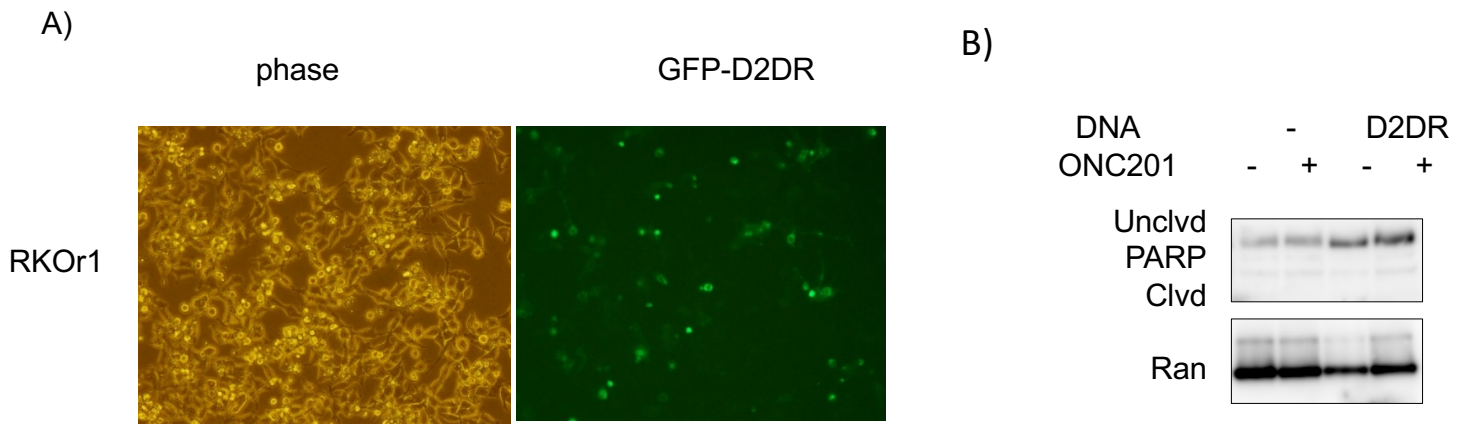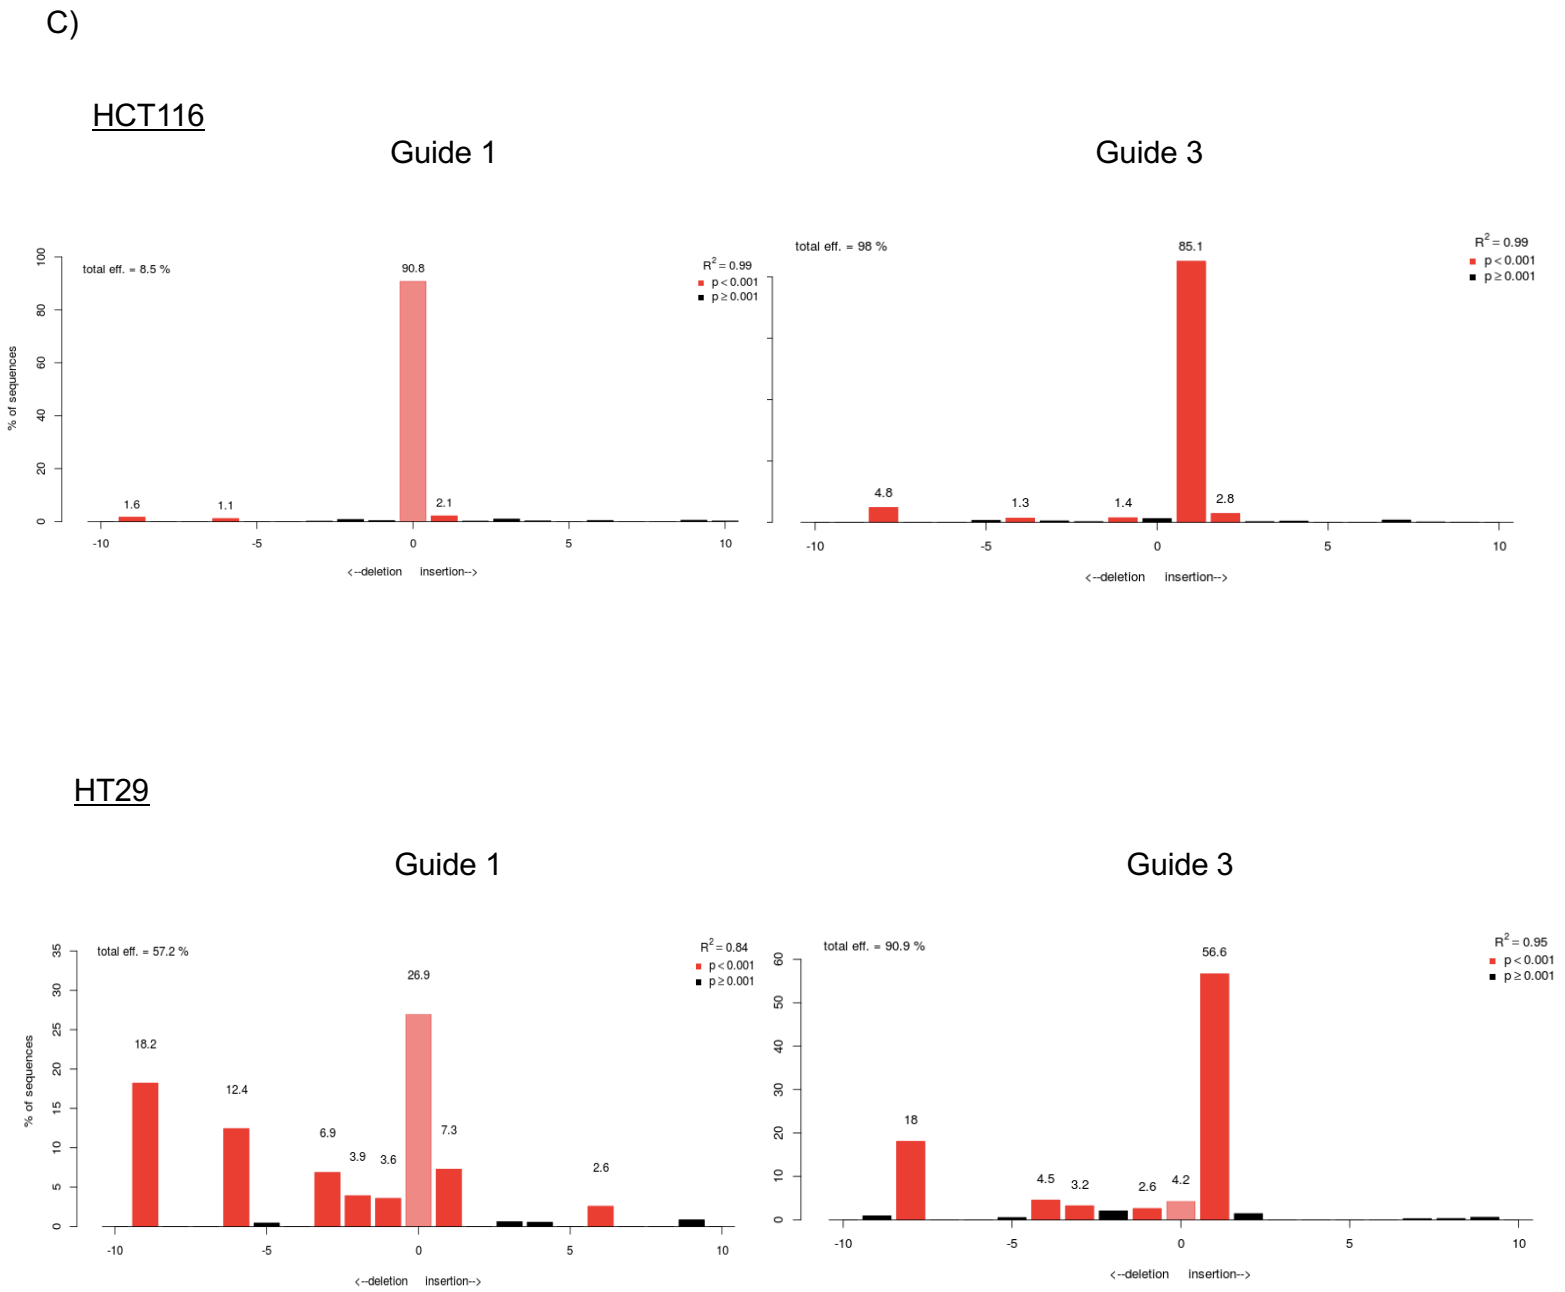

C) cont.

SKNSH

Guide 3

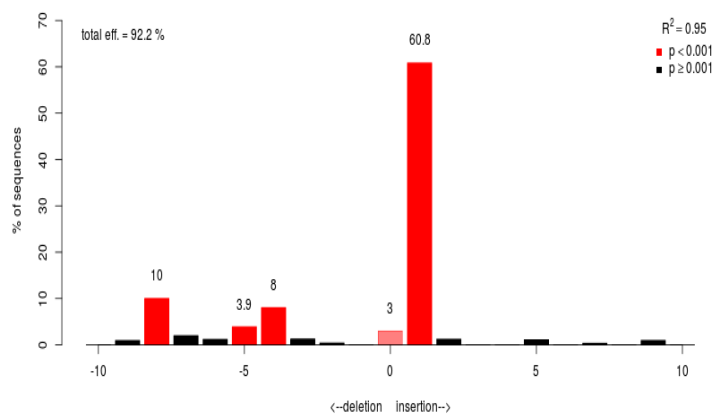

D)

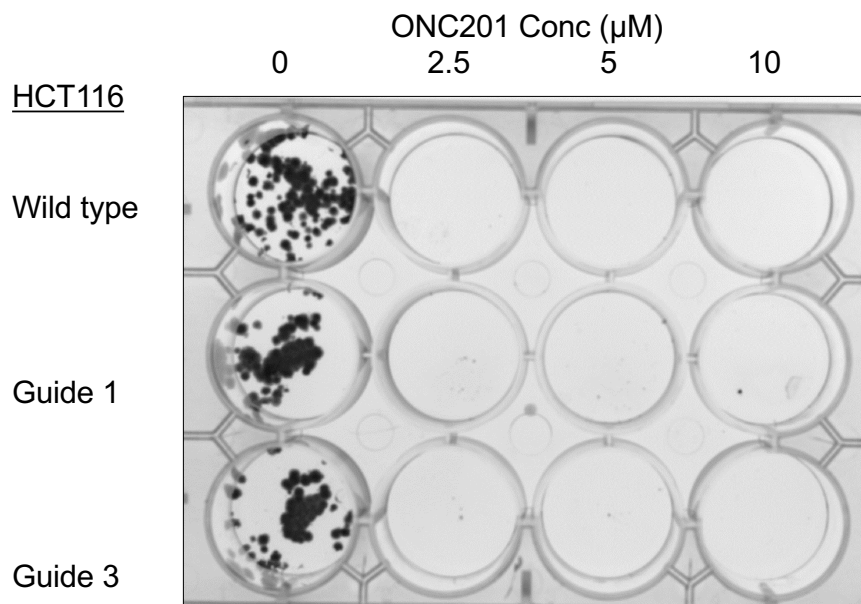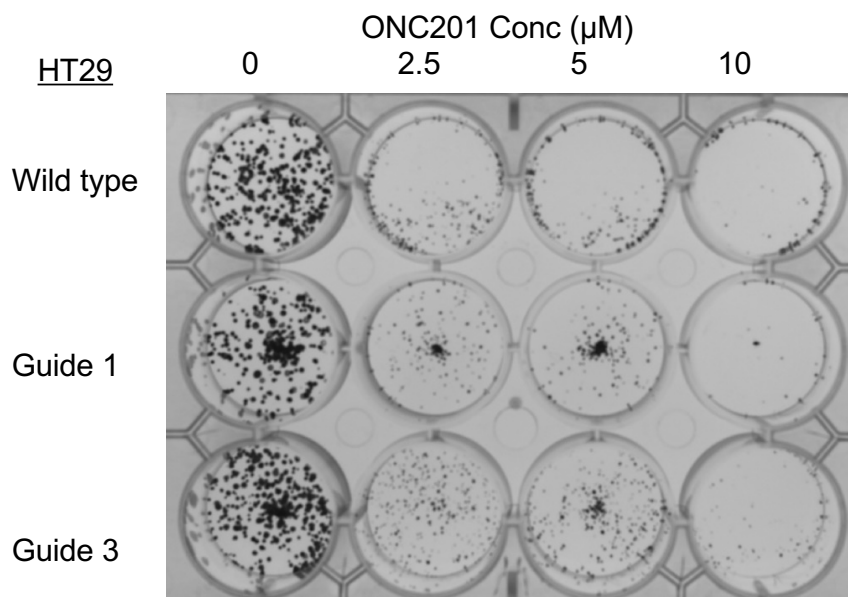

E)

## MDA231 DRD2 Knockout

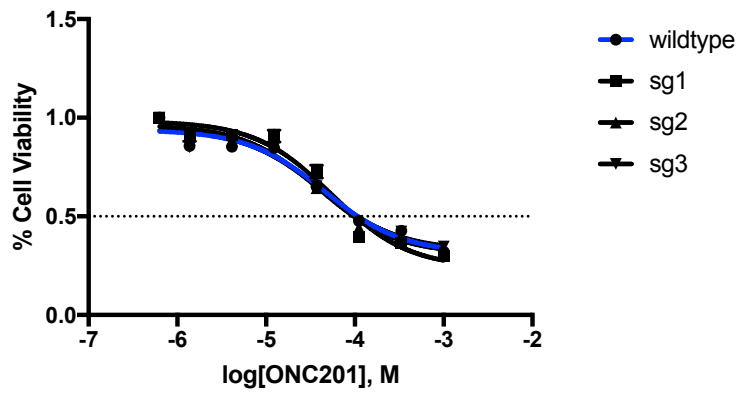

| CRISPR Guide RNA's | Indel rate (%) |
|--------------------|----------------|
| Guide 1 (sg1)      | 91.8           |
| Guide 2 (sg2)      | 52.8           |
| Guide 3 (sg3)      | 96.4           |

## SUM491PT DRD2 Knockout

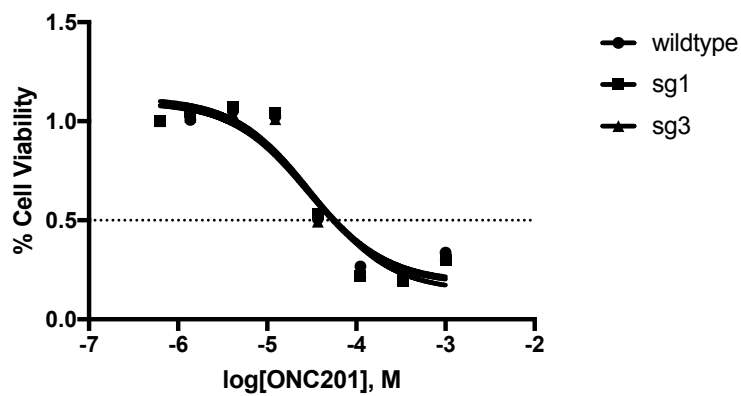

| CRISPR Guide RNA's | Indel rate (%) |
|--------------------|----------------|
| Guide 1 (sg1)      | 75.5           |
| Guide 3 (sg3)      | 90             |

## MDA231 DRD3 Knockout

F)

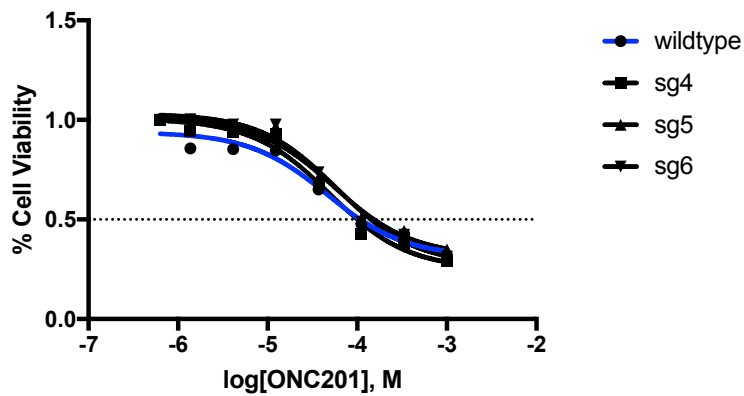

| CRISPR Guide RNA's | Indel rate (%) |
|--------------------|----------------|
| Guide 4 (sg4)      | 93.6           |
| Guide 5 (sg5)      | 87.9           |
| Guide 6 (sg6)      | 97.8           |

## SUM491PT DRD2 Knockout

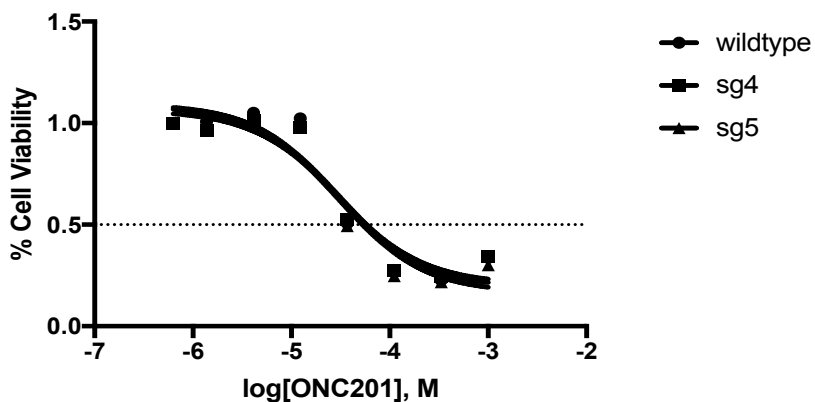

| CRISPR Guide RNA's | Indel rate (%) |
|--------------------|----------------|
| Guide 4 (sg4)      | 75.8           |
| Guide 5 (sg5)      | 89.2           |

Cell line: HCT116 RKO

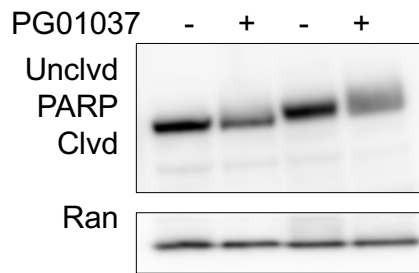

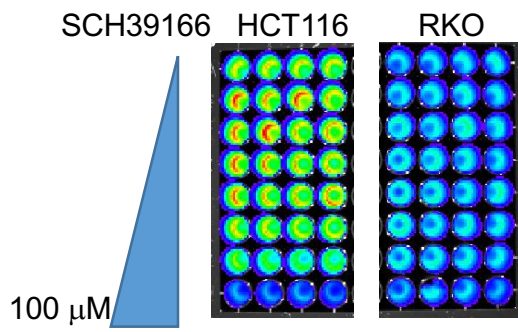

Supplement: mmc1.pdf [file mmc1.pdf]
